# Supplementary material
Source: publisher figshare collection journal article supplement (https://asha.figshare.com/articles/dataset/_/21067585)

**Supplemental Material S2.** Overview of remote hearing aid fitting pathway during the initial COVID lockdown at UHP.

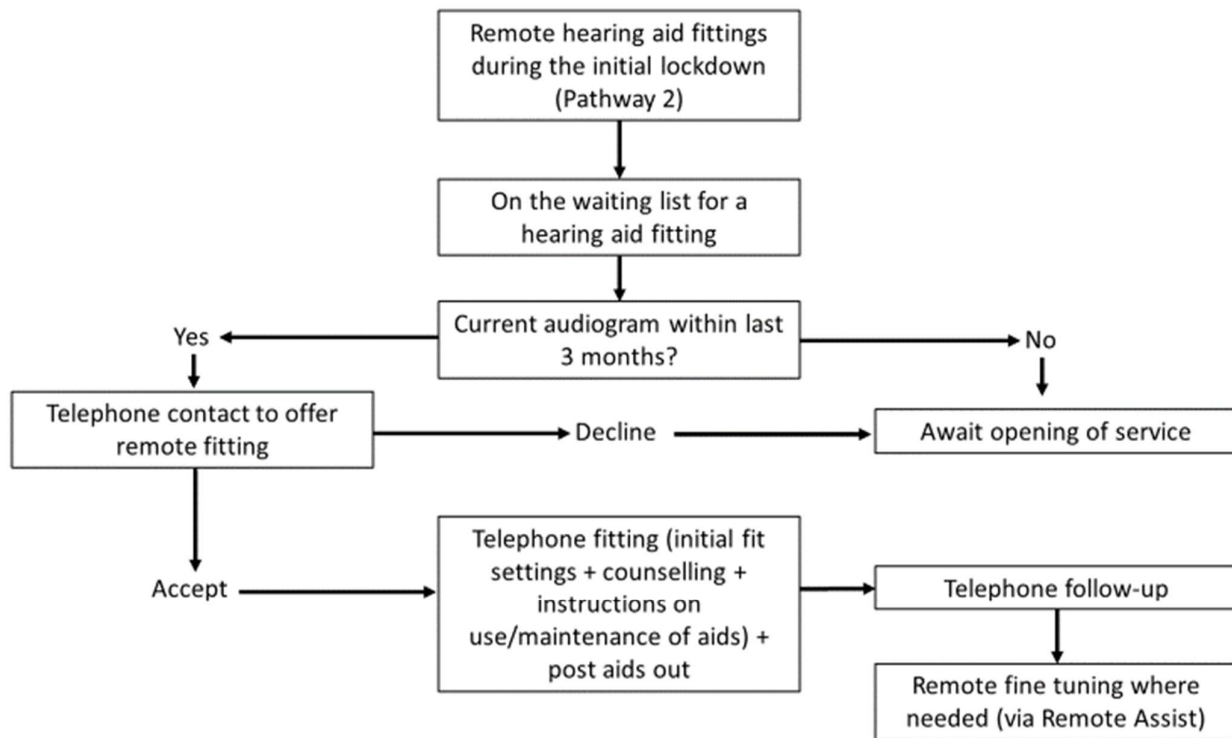

Supplement: Supplementary file 2 [file 1]
