# Supplementary material
Source: publisher figshare collection journal article supplement (https://asha.figshare.com/articles/dataset/_/21067585)
Supplement: Supplementary file 3 [file 1]

**Supplemental Material S7.** Table showing common themes identified in patient comments to questions on the patient satisfaction questionnaire regarding the questions, “Tell us anything we could have done to improve your experience,” and “What additional support would you have found helpful?”

| Group 1                                                                                                                   | Group 2                                                                                                                                                               | Group 3                                                                                                                                                      |
|---------------------------------------------------------------------------------------------------------------------------|-----------------------------------------------------------------------------------------------------------------------------------------------------------------------|--------------------------------------------------------------------------------------------------------------------------------------------------------------|
| <ul style="list-style-type: none"><li>• More time going through the BeMore app</li><li>• Demo of the BeMore app</li></ul> | <ul style="list-style-type: none"><li>• A fitting appointment which was face-to-face</li><li>• A face-to-face follow-up</li><li>• Improved fitting of tubes</li></ul> | <ul style="list-style-type: none"><li>• A face-to-face appointment</li><li>• A face-to-face follow-up</li><li>• Audiologists could use clear masks</li></ul> |
