# Supplementary material
Source: publisher figshare collection journal article supplement (https://asha.figshare.com/articles/dataset/_/21067585)
Supplement: Supplementary file 5 [file 1]

**Supplemental Material S4.** Table showing the number of new hearing aid users in each group receiving different methods of verification at their hearing aid fitting.

|                        | REM | RECD | No in-situ verification |
|------------------------|-----|------|-------------------------|
| Group new users 1      | 38  | 0    | 2                       |
| Group new users 2      | 0   | 0    | 15                      |
| Group new users 3      | 25  | 4    | 11                      |
| All new users combined | 63  | 4    | 28                      |
