# Supplementary material
Source: publisher figshare collection journal article supplement (https://asha.figshare.com/articles/dataset/_/21067585)
Supplement: Supplementary file 6 [file 1]

**Supplemental Material S5.** Table showing the number of existing hearing aid users in each group receiving different methods of verification at their hearing aid fitting.

|                             | REM | RECD | No in-situ verification |
|-----------------------------|-----|------|-------------------------|
| Group existing users 1      | 37  | 0    | 3                       |
| Group existing users 2      | 0   | 0    | 65                      |
| Group existing users 3      | 21  | 7    | 12                      |
| All existing users combined | 58  | 7    | 80                      |
