# Supplementary material
Source: publisher figshare collection journal article supplement (https://asha.figshare.com/articles/dataset/_/21067585)
Supplement: Supplementary file 7 [file 1]

**Supplemental Material S6.** Table showing common themes identified in patient comments from the patient satisfaction question regarding the question, “Overall how would you rate our service?”

| Themes            | Group 1                                                                                                        | Group 2                                                                                                                                                                                                                                                | Group 3                                                                                                                                                                                                                     |
|-------------------|----------------------------------------------------------------------------------------------------------------|--------------------------------------------------------------------------------------------------------------------------------------------------------------------------------------------------------------------------------------------------------|-----------------------------------------------------------------------------------------------------------------------------------------------------------------------------------------------------------------------------|
| Positive comments | <ul style="list-style-type: none"> <li>Professional</li> <li>Efficient</li> <li>Appointment on time</li> </ul> | <ul style="list-style-type: none"> <li>Professional</li> <li>Quick service</li> </ul>                                                                                                                                                                  | <ul style="list-style-type: none"> <li>Video appointment worked well</li> <li>Good not to travel to hospital</li> <li>Video much easier than phone</li> <li>Felt comfortable in clinic with COVID-19 precautions</li> </ul> |
| Negative comments | <ul style="list-style-type: none"> <li>Peripheral clinics not open for follow-ups</li> </ul>                   | <ul style="list-style-type: none"> <li>Difficult to fit hearing aids correctly in ears</li> <li>Needed a face-to-face appointment</li> <li>Expected a face-to-face follow-up once restrictions eased</li> <li>Unable to lip read over phone</li> </ul> | <ul style="list-style-type: none"> <li>Department busy</li> <li>Hard to hear with masks</li> </ul>                                                                                                                          |
