# Supplementary material
Source: publisher figshare collection journal article supplement (https://asha.figshare.com/articles/dataset/_/21067585)

**Supplemental Material S3.** Overview of the blended hearing aid pathway post-lockdown at UHP.

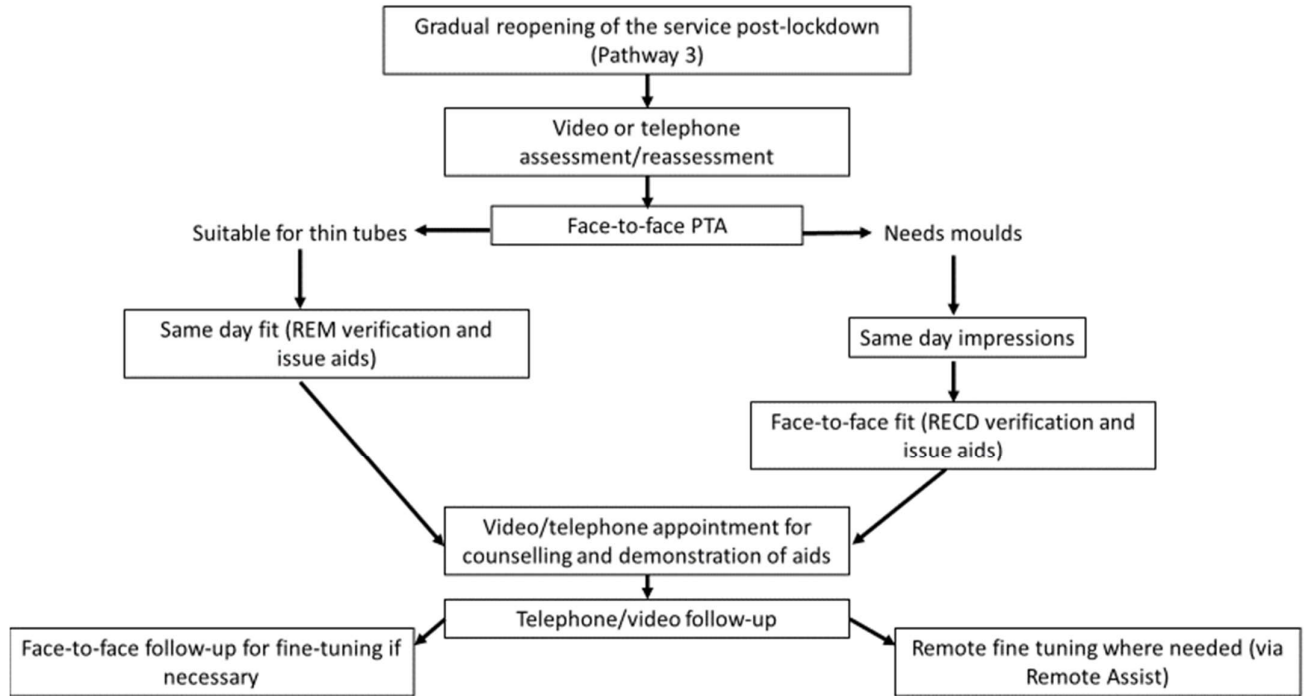

Supplement: Supplementary file 1 [file 1]

**Supplemental Material S1.** Overview of hearing aid pathway pre-COVID at UHP.

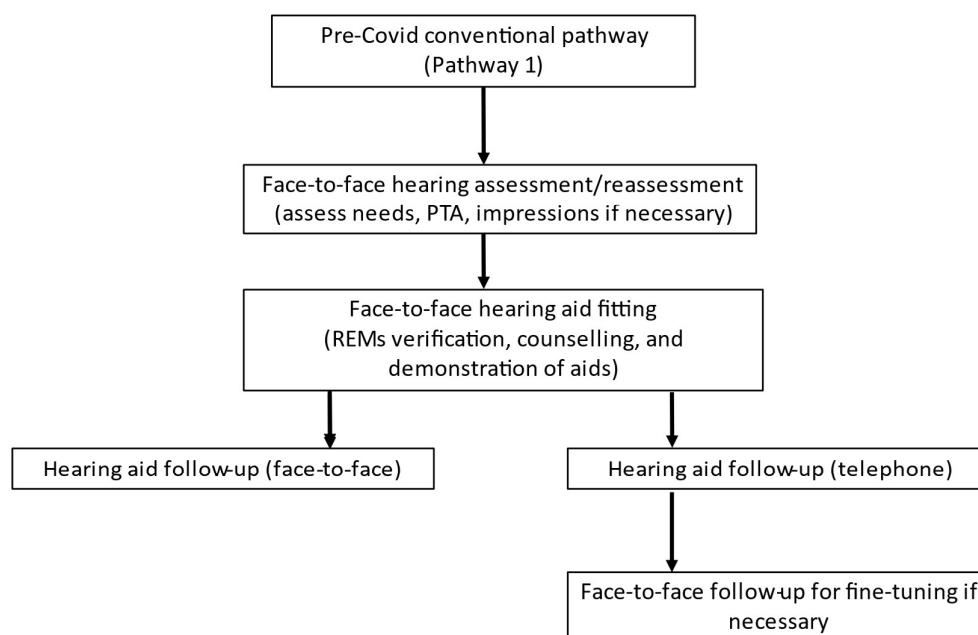

Supplement: Supplementary file 4 [file 1]
